# Supplementary material for: Synthetic genetic oscillators demonstrate the functional importance of phenotypic variation in pneumococcal-host interactions
Source: PubMed Central journal article supplement (PMC10656556; doi:10.1038/s41467-023-43241-y), 2023-11-17
Supplement: 41467_2023_43241_MOESM3_ESM.pdf [file 41467_2023_43241_MOESM3_ESM.pdf]

## **Description of Additional Supplementary Files**

File Name: Supplementary Data S1

Description: Strains and Plasmids used in this study.

File Name: Supplementary Data S2

Description: Oligonucleotides used in this study.

File Name: Supplementary Movie S1

Description: Time-lapse fluorescence microscopy of the CRISPRlator strain (VL3757) grown within a microfluidics device. The CRISPRlator strain and design of the microfluidics device used is show in Fig. 2. Images were taken every 5 min.

File Name: Supplementary Movie S2

Description: Time-lapse fluorescence microscopy of the CAPSULATOR strain (VL4315) grown within a microfluidics device. The CAPSULATOR strain and design of the microfluidics device used is show in Fig. 2 and Fig. 3. Images were taken every 5 min.
